# Supplementary material for: Sub lethal levels of platinum nanoparticle cures plasmid and in combination with carbapenem, curtails carbapenem resistant Escherichia coli
Source: PubMed Central journal article supplement (PMC6438982; doi:10.1038/s41598-019-41489-3), 2019-03-28
Supplement: 41598_2019_41489_MOESM1_ESM.pdf [file 41598_2019_41489_MOESM1_ESM.pdf]

**Supporting Information:**

**Sub lethal levels of platinum nanoparticle cures plasmid and in combination with carbapenem, curtails carbapenem resistant *Escherichia coli***

Subhashree Bharathan<sup>§,a</sup>, Niranjana Sri Sundaramoorthy<sup>§a</sup>, Harini Chandrasekharan<sup>a</sup> Gagana Preetham<sup>a</sup>, ArunKumar GaneshPrasad<sup>a</sup> Siva Bala Subramaniyan<sup>b</sup>, Anbazhagan Veerappan<sup>b</sup> \* and Saisubramanian Nagarajan<sup>\*a,b</sup>

<sup>§</sup>Both authors have equally contributed for the work

<sup>a</sup> Center for Research in Infectious Diseases, School of Chemical and Biotechnology, SASTRA

<sup>b</sup> Department of Chemistry, School of Chemical and Biotechnology, SASTRA, Thanjavur

**Supplementary Table 1:** Antimicrobial profiling of XDR U3790

| <b>Antibiotic/Compound</b> | <b>Minimum Inhibitory Concentration (µg/ml)</b> |
|----------------------------|-------------------------------------------------|
| <b>Ceftriaxone</b>         | >128                                            |
| <b>Ciprofloxacin</b>       | 256                                             |
| <b>Colistin</b>            | 32                                              |
| <b>Erythromycin</b>        | 256                                             |
| <b>Gentamicin</b>          | 256                                             |
| <b>Kanamycin</b>           | >256                                            |
| <b>Levofloxacin</b>        | 32                                              |
| <b>Meropenem</b>           | >32                                             |
| <b>Norfloxacin</b>         | >128                                            |
| <b>Streptomycin</b>        | 16                                              |
| <b>Tetracycline</b>        | 128                                             |
| <b>Tigecycline</b>         | >128                                            |
| <b>Tobramycin</b>          | 128                                             |

**Supplementary Table 2: Output from the plasmid finder tool used for identification of plasmid from the contig Sequences**

| <b>Plasmid</b>                 | <b>Identity</b> | <b>Query /<br/>Template<br/>length</b> | <b>Contig</b>                    | <b>Position<br/>in contig</b> | <b>Note</b>            | <b>Accession<br/>number</b>     |
|--------------------------------|-----------------|----------------------------------------|----------------------------------|-------------------------------|------------------------|---------------------------------|
| IncFIA                         | 99.74           | 388 / 388                              | MyFirstAss<br>embly_rep_<br>c200 | 3592..397<br>9                |                        | <a href="#">AP001918</a>        |
| IncFIB(AP00<br>1918)           | 98.39           | 682 / 682                              | MyFirstAss<br>embly_rep_<br>c201 | 5248..592<br>9                |                        | <a href="#">AP001918</a>        |
| IncFII(pAM<br>A1167-<br>NDM-5) | 99.62           | 261 / 261                              | MyFirstAss<br>embly_rep_<br>c213 | 7730..799<br>0                | pAMA1<br>167-<br>NDM-5 | <a href="#">CP024805.<br/>1</a> |
| IncI1                          | 100             | 142 / 142                              | MyFirstAss<br>embly_rep_<br>c206 | 17954..18<br>095              | Alpha                  | <a href="#">AP005147</a>        |
| p0111                          | 98.53           | 885 / 885                              | MyFirstAss<br>embly_rep_<br>c199 | 30512..31<br>396              |                        | <a href="#">AP010962</a>        |

## Supplementary Figure 1: TEM image and zeta potential of pectin capped PtNPs

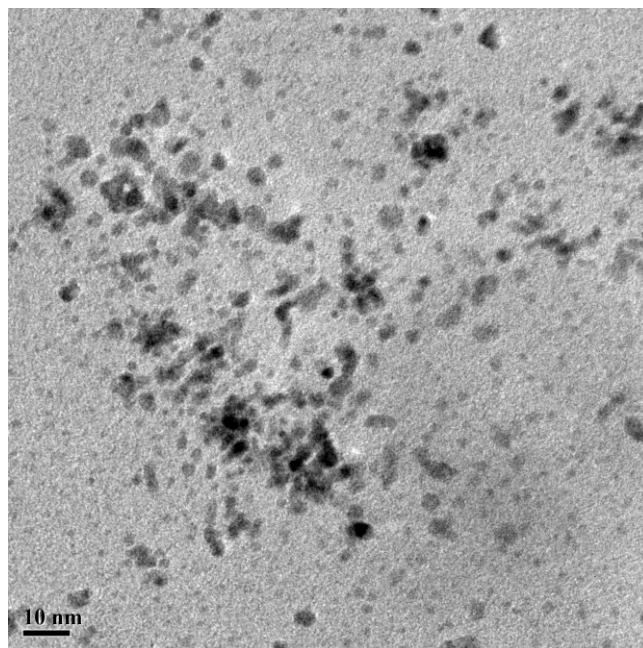

### Results

|                             | Mean (mV)     | Area (%) | St Dev (mV) |
|-----------------------------|---------------|----------|-------------|
| Zeta Potential (mV): -38.9  | Peak 1: -38.7 | 98.7     | 6.42        |
| Zeta Deviation (mV): 6.74   | Peak 2: -59.8 | 1.3      | 2.50        |
| Conductivity (mS/cm): 0.241 | Peak 3: 0.00  | 0.0      | 0.00        |
| Result quality: Good        |               |          |             |

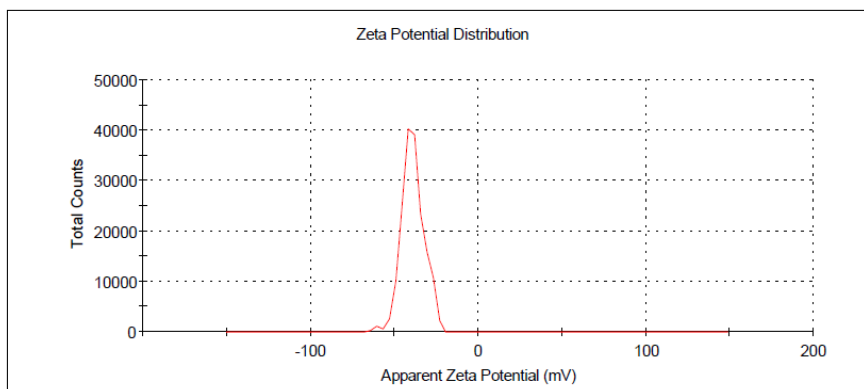

**Supplementary Figure 2:** (The full length gel image of Figure 1B) Gel picture showing absence of plasmid in cured SCV strain (L1, L5) and its presence in uncured strain (L2, L6) and in wild type (L3, L7), 1 KB ladder Molecular weight marker (L4).

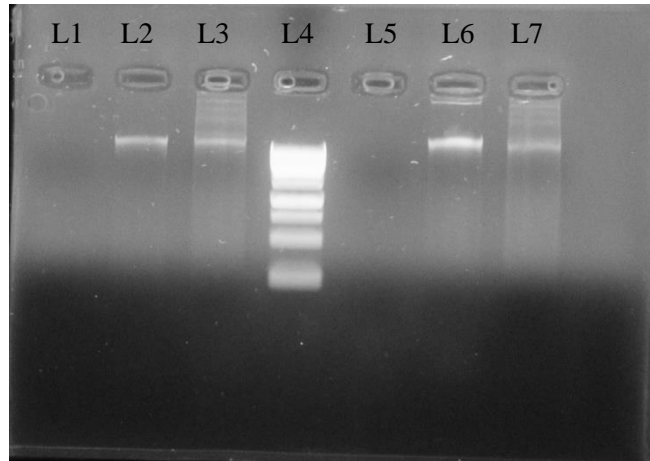

**Supplementary Figure 3: ABST test showing plasmid curing restores sensitivity to meropenem in SCV.** Antibiotic susceptibility test was performed for the wild type U3790, large colony variant (LCV) and small colony variant (SCV) by exposing the strain to PtNPs and the zone of inhibition was measured. SCV exhibited a larger zone of inhibition (16mm) relative to its wild type and LCV (10mm).

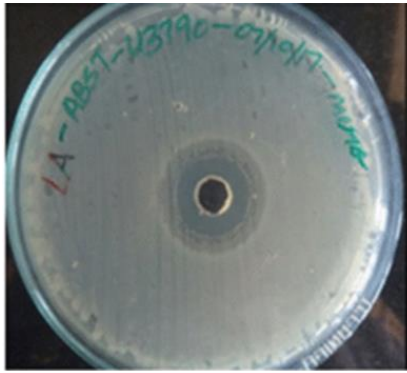

Wild type

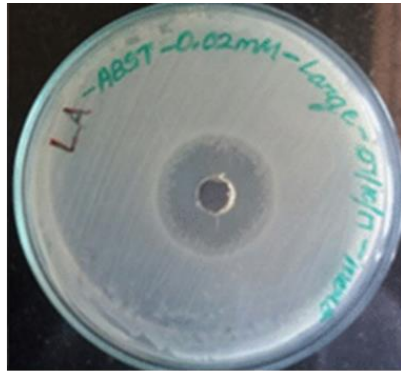

LCV

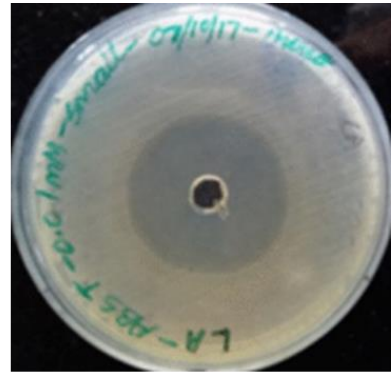

SCV

**Supplementary Figure 4: PCR amplification of ESBL and mcr-1 genes.** Plasmid harbored carbapenem resistant genes. *bla*<sub>OXA23</sub>, *bla*<sub>OXA 48</sub> and *bla*<sub>NDM</sub> genes were amplified by PCR using plasmid DNA as template.

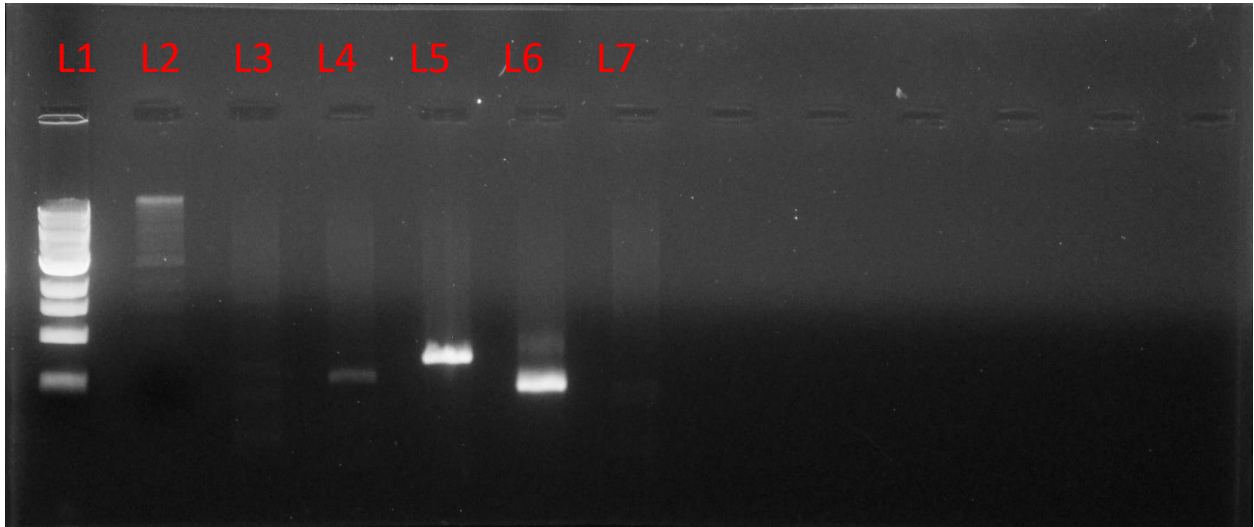

L1: Molecular weight marker  
L2: Plasmid DNA template  
L3: *bla*<sub>KPC</sub>  
L4: *bla*<sub>OXA23</sub>  
L5: *bla*<sub>OXA48</sub>  
L6: *bla*<sub>NDM</sub>  
L7: *bla*<sub>VIM</sub>

**Supplementary Figure 5: Detection of Incompatibility groups in plasmid.** PCR amplification of plasmid from U3790 as template showed the presence of IncI1, IncFII, IncFIA, IncFIB and pO111.

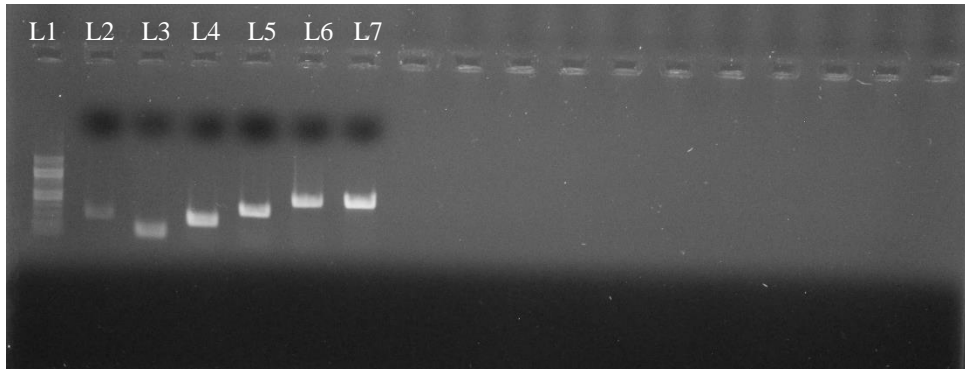

Lane Description:  
L1: Molecular weight marker  
L2: Other sample  
L3: IncI1  
L4: IncFII  
L5: IncFIA  
L6: IncFIB  
L7: pO111



**Supplementary Figure 6: Capsulated strain:** Capsular staining indicates that U3790 possesses capsule as evidenced by halo around bacilli, which might have prevented the action of SDS/AO on plasmid.

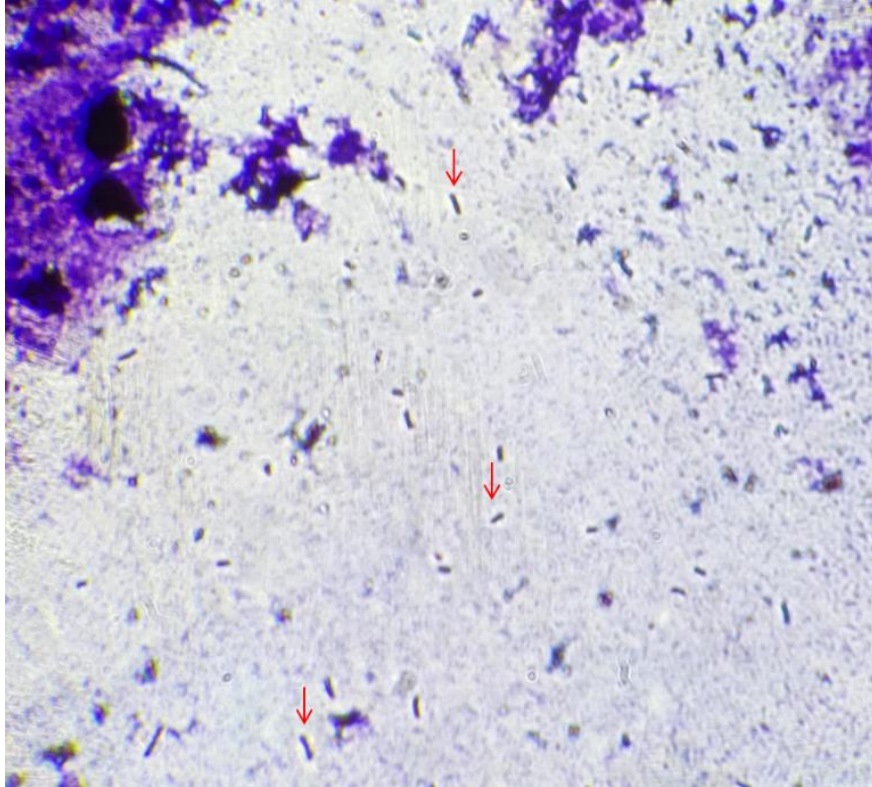

**Supplementary Figure 7:** (The full length gel image of Figure 2b) Plasmid extracted from transformants on LB + antibiotic plate showed reappearance of plasmid band.

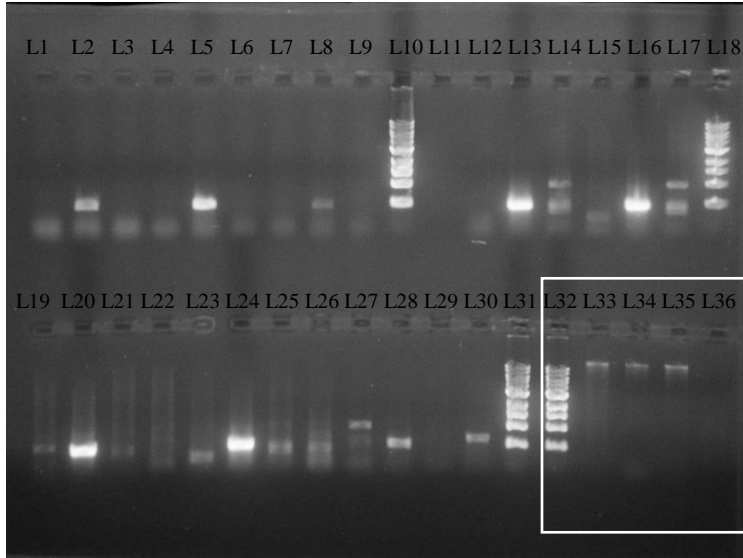

L1-L31 – Samples of different experiment

L32 - Molecular weight marker

L33 - U3790 Wild type

L34 - Transformant – 1

L35 – Transformant – 2

L36 – Untransformed cured colony (SCV)

**Supplementary Figure 8:** PtNPs cures plasmid from *E.coli* strain. 20  $\mu$ M of PtNPs was effective in eliminating plasmid from *E.coli* DH5 $\alpha$  strain harboring yeast expression vector p2GB42/Kan

**Plasmid Gel Image**

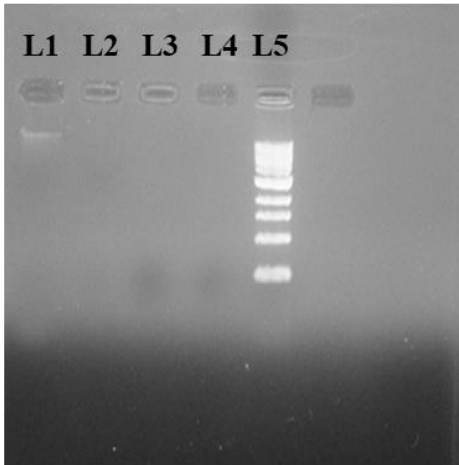

- L1-** Plasmid from *E.coli* 17260
- L2-** Plasmid from *E.coli* 17260 treated with Nanoparticle(0.02mM)
- L3-** Plasmid from *E.coli* 17260 treated with SDS
- L4-** Plasmid from *E.coli* 17260 treated with AO
- L5-** Molecular Weight Marker

**Spot Plating on Kanamycin Plates**

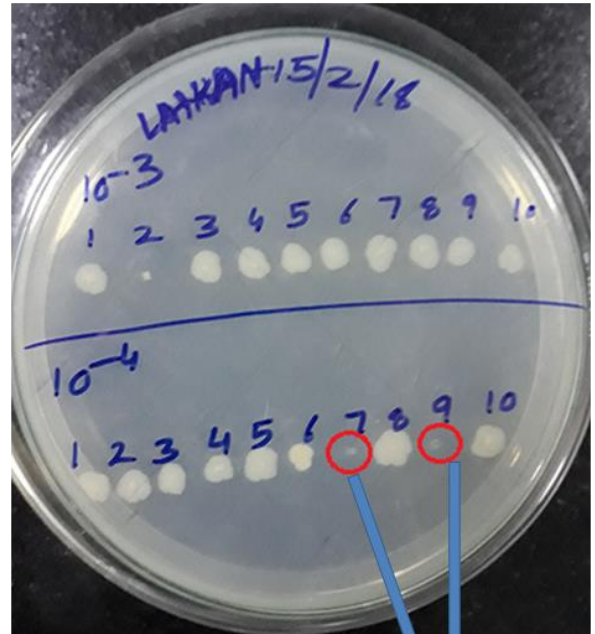

**Cured Colonies**

**Supplementary Figure 9: Growth fitness assay revealed that SCV displayed lower fitness relative to LCV.**

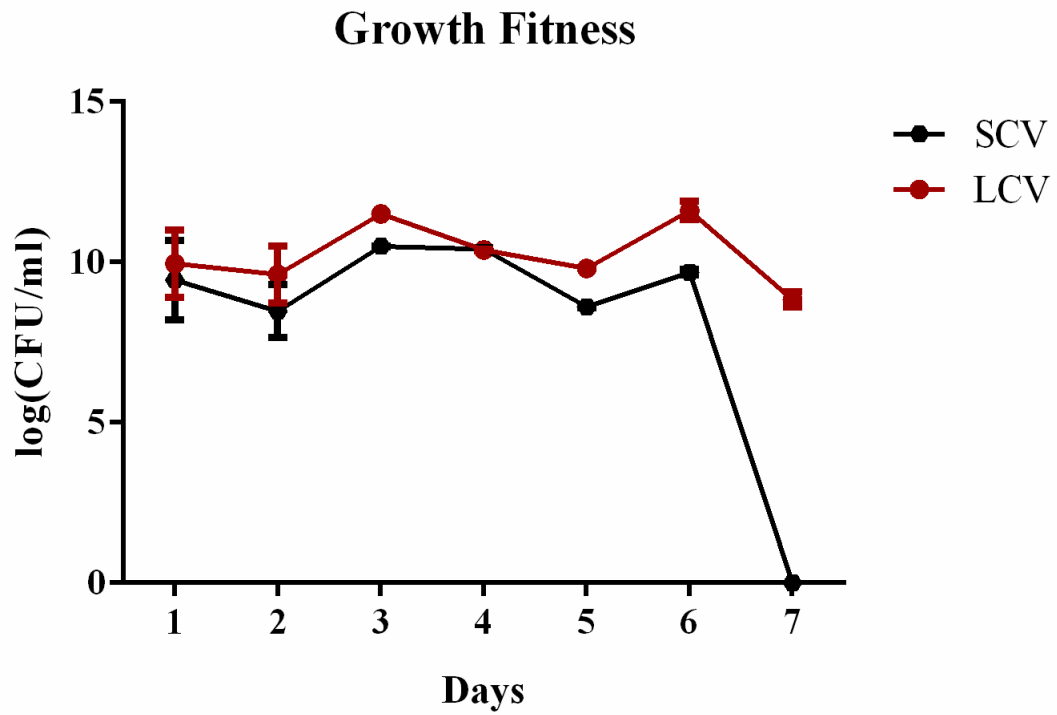

**Supplementary Figure 10: Hemocompatibility assay. (A) Untreated human RBC and (B) human RBC treated with 200  $\mu$ M PtNPs.** RBC were incubated with 200 $\mu$ M PtNPs for 30min and evaluated under microscope for morphological changes. No damage to the cells were observed, which shows intrinsic hemocompatibility.

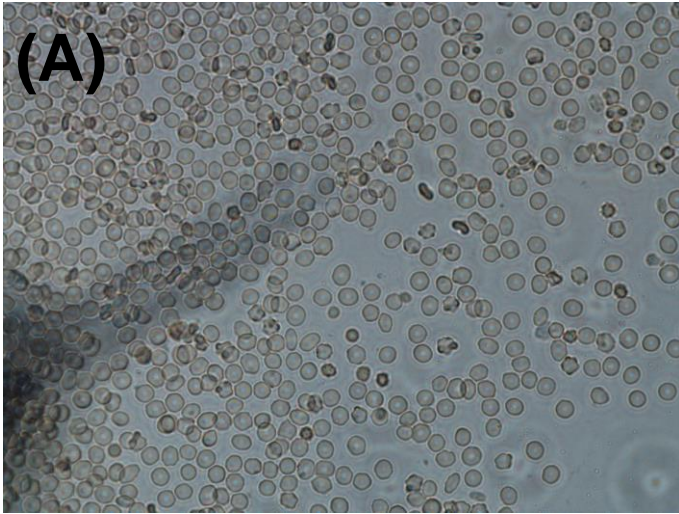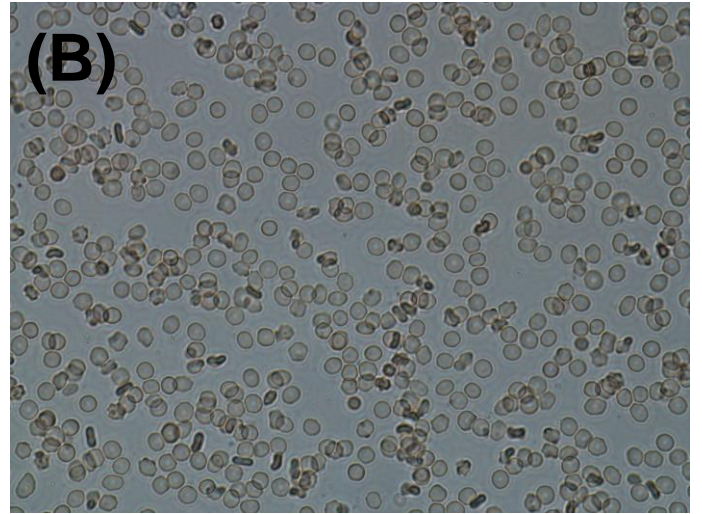

**Supplementary Figure 11: PtNP along with antibiotic cures plasmid *in vivo*.** SCVs isolated from infected muscle tissue of fish lacks plasmid Molecular weight marker (L6), SCV from zebrafish muscle tissue treated with PtNP alone (L7 & L8) and PtNP + Meropenem (L9&L10) were devoid of the plasmid relative to bacteria treated with meropenem (L11)

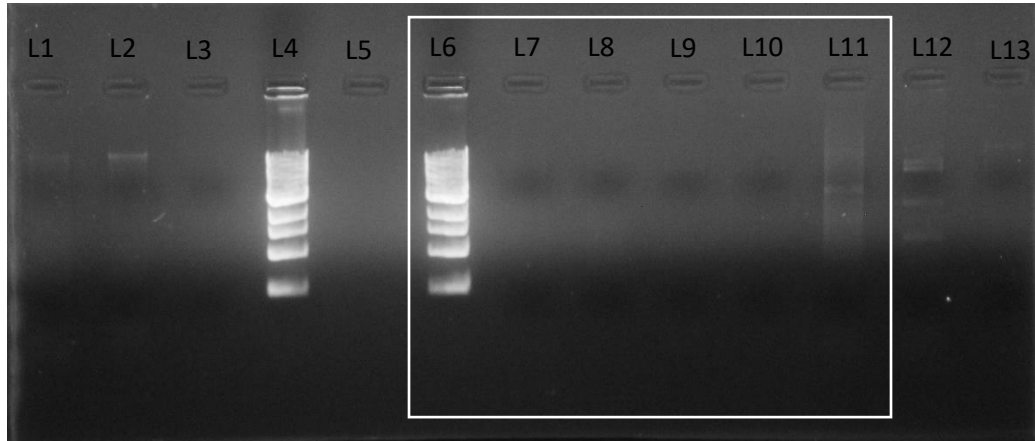

**KEY:**

L1 to L5 & L12, L13 - Samples of different experiment

L6 - Molecular weight Marker

L7 & 8 - SCV from zebrafish muscle treated with PtNP alone

L9 & 10 - SCV from zebrafish muscle treated with Meropenem +PtNPs

L11 – SCV from zebrafish muscle treated with meropenem

**Supplementary Figure 12: PtNPs does not perturb Membrane potential in carbapenem resistant *E.coli*.** Cells were incubated with PtNPs and Disc3 for 1hr and the fluorescence were measured at Ex605nm and Em665nm. The experiment was performed in triplicates and the error bar represents the mean standard error from three independent experiments.

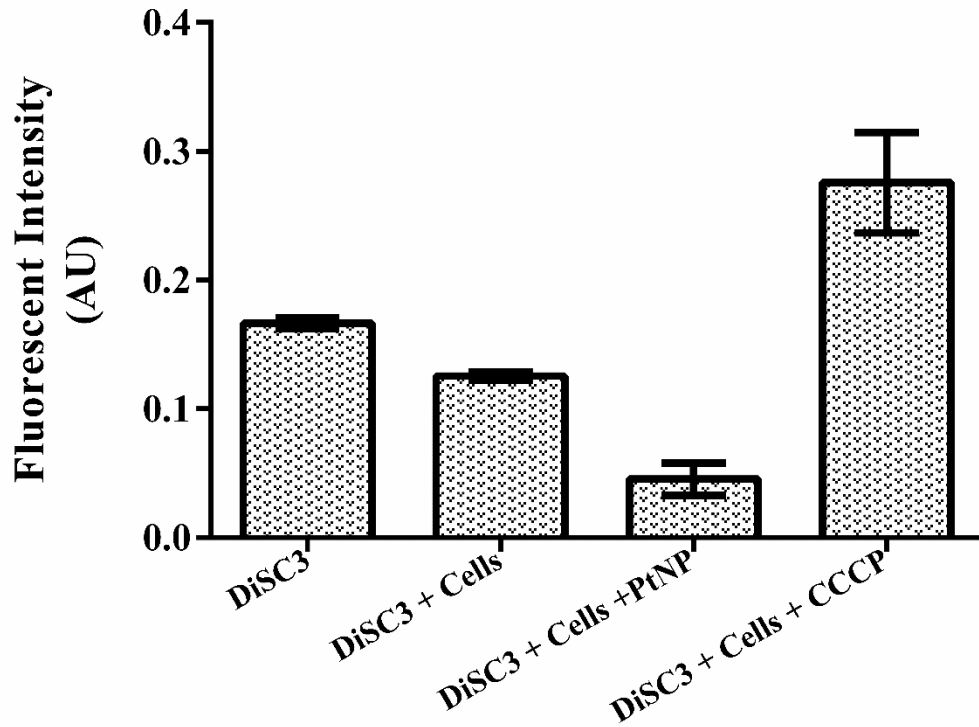

**Supplementary Figure 13: PtNPs at sub MIC levels does not induce intracellular ROS in *E.coli*.** Cells were treated with PtNPs and H<sub>2</sub>O<sub>2</sub>, as positive control. The fluorescence intensity is measured with excitation and emission at 495nm and 529nm. ROS generation was determined by the conversion of DCFDA to DCF. The experiment was performed in triplicates and the error bar represents the mean standard error from three independent experiments.

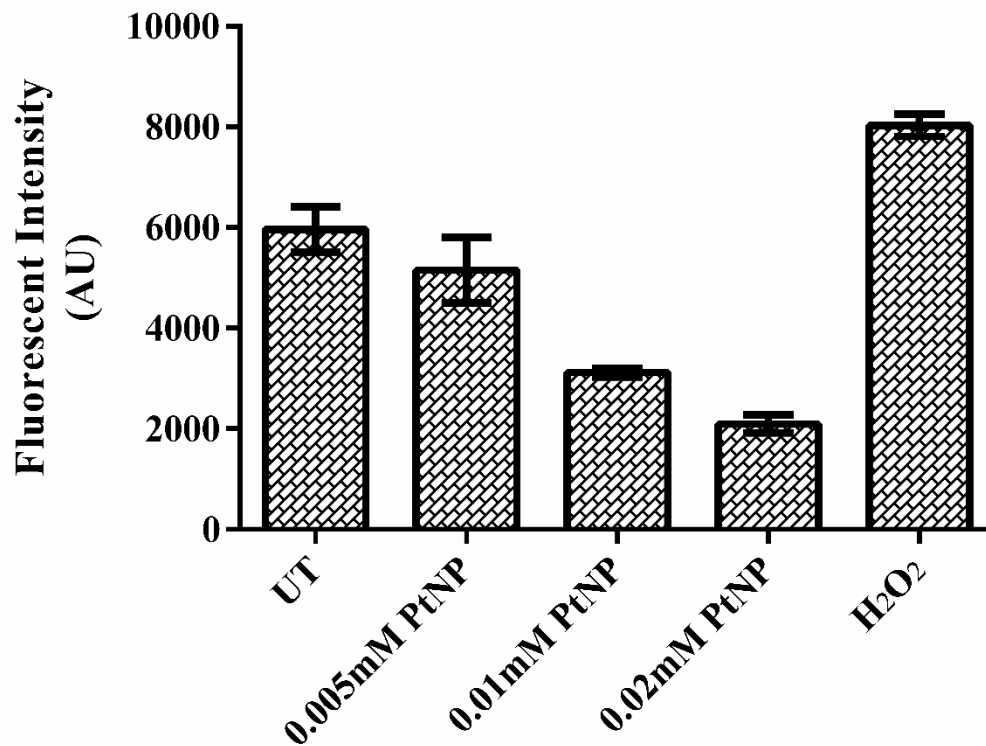



**Supplementary Figure 14: Platinum NP (20  $\mu$ M) treatment for 24h does not affect cell viability of *E.coli*.** Proportion of propidium iodide stained cells were negligible in PtNP treatment relative to Triton X 100 treatment and plating reveals reduction in cell density for Triton X 100 treatment but not PtNP treatment.

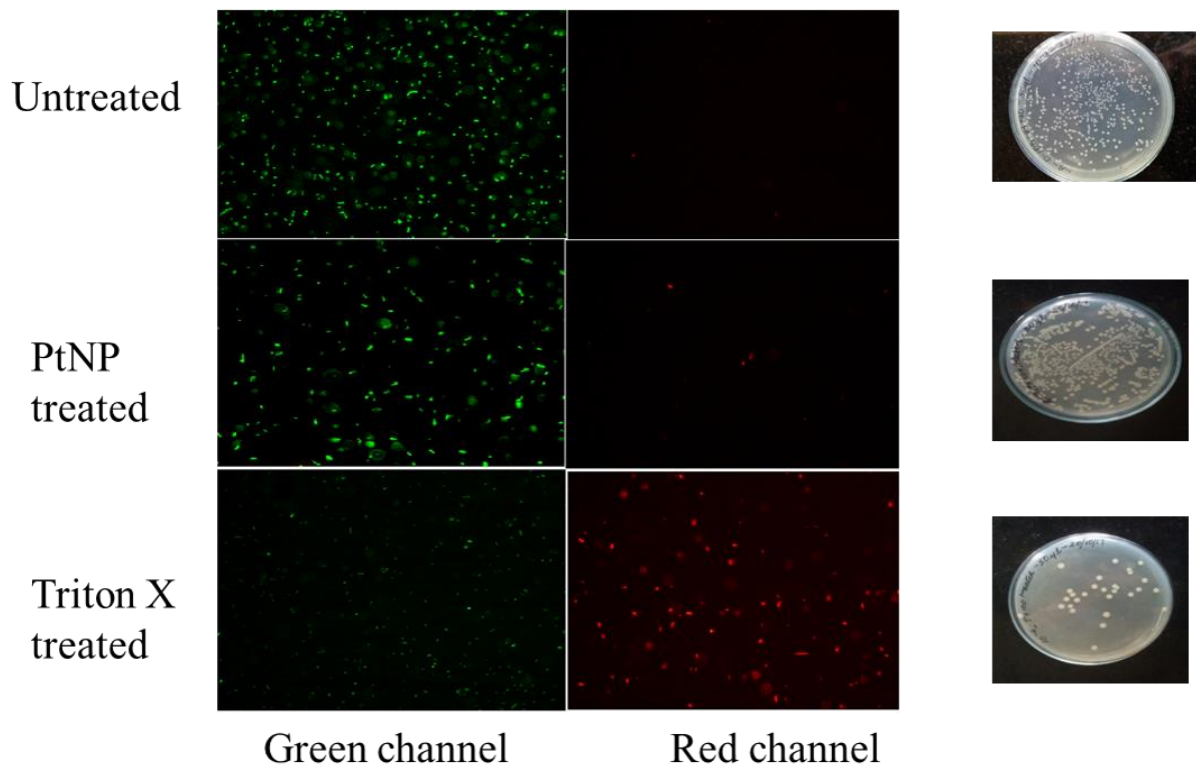

**Supplementary Figure 15:** (The full length gel image of Figure 6) PtNPs induce DNA cleavage in presence and absence of gyrase.

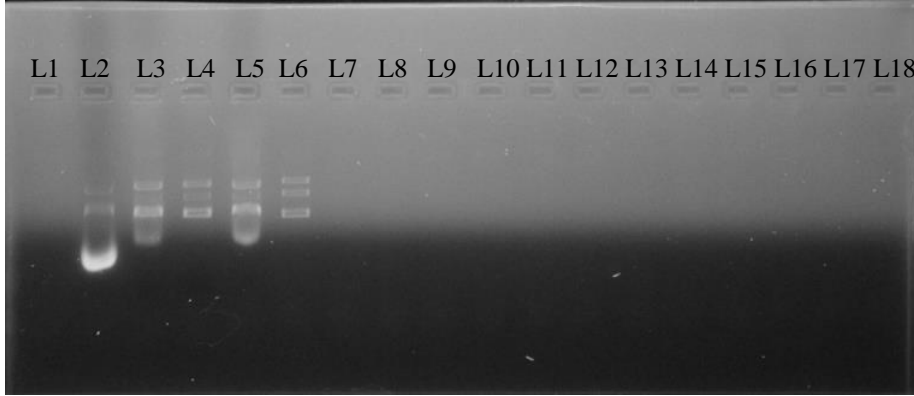

L2 – R. DNA + gyrase+ ciprofloxacin  
L3 – R. DNA + gyrase+ PtNPs  
L4 – R. DNA + gyrase  
L5 – R. DNA + PtNPs  
L6 – R. DNA  
L1, L7 – L18 – Empty wells
